# Supplementary material
Source: Springer Nature journal article supplement (https://www.springermedizin.de/resource/supplementary/12879_2011_2109_MOESM4_ESM.pdf/9443712)
Supplement: MOESM4 [file 9443712]

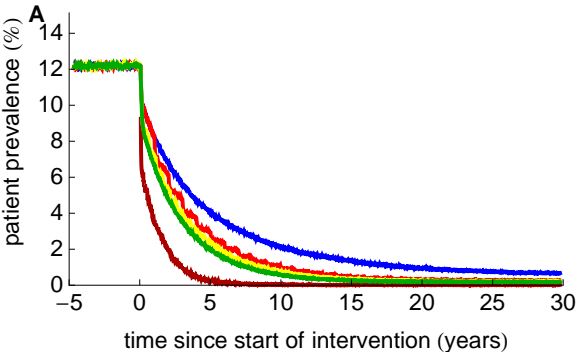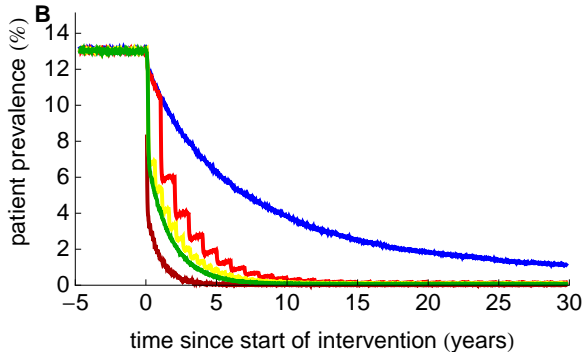

- Patient isol. eff. 50%
- Patient isol. eff. 50% + HCW decol. 1/year
- Patient isol. eff. 50% + HCW decol. 2/year
- Patient isol. eff. 50% + HCW decol. 6/year
- patients decol. eff. 100%
